# Supplementary material
Source: publisher figshare collection journal article supplement (https://sage.figshare.com/ndownloader/files/20907510)

**Supplementary Figure 1: Decalcification of 8  $\mu\text{m}$  thick cryosections of day 7 bone fracture calluses resulted in the rupturing of the callus tissue.** Representative images of day 7 fracture callus cryosection of 8  $\mu\text{m}$  thickness stained histologically with safranin O fast green are shown. Images were taken at 40X magnification.

## Safranin O Fast green staining - 8 $\mu\text{m}$ sections

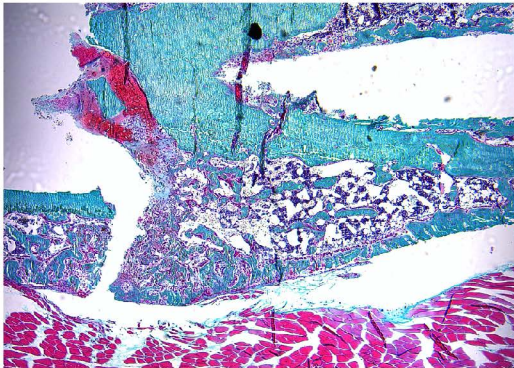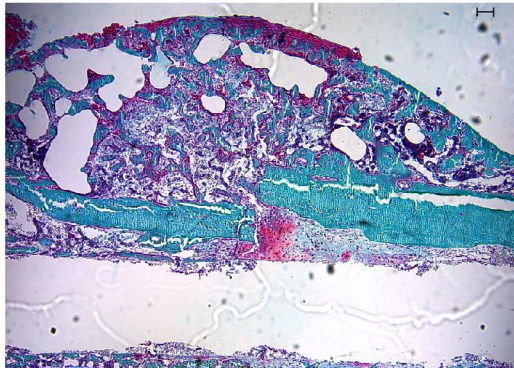

Supplement: Supplementary file 1 [file 20907510]
